# Supplementary material for: Substituent-modulated organic single crystals with a rapid natural light photomechanical response
Source: Royal Society of Chemistry journal article supplement (doi:10.1039/d5cc05755h), 2025-12-09
Supplement: d5cc05755h7.pdf [file d5cc05755h7.pdf]

## Supporting Information

### **Substituent-modulated organic single crystals with rapid natural light photomechanical response**

**Zhengcheng Wang,<sup>1</sup> Lin Gao,<sup>1</sup> Qi Yu,<sup>2\*</sup> Guoming Wang<sup>1\*</sup>**

<sup>1</sup>*College of Chemistry and Chemical Engineering, Qingdao University, Shandong 266071, China*

<sup>2</sup>*School of Chemistry and Chemical Engineering, University of Jinan, Jinan 250022, China*

## 25 1.1 Experimental section

### 26 1.2 Synthesis

27 (Z)-3-(anthracen-9-yl)-2-phenylacrylonitrile (**Z-3AN2PA**), (Z)-3-(anthracen-9-yl)-  
28 2-(4-(trifluoromethyl)phenyl)acrylonitrile (**Z-3AN2PA-CF<sub>3</sub>**), (Z)-3-(anthracen-9-yl)-  
29 2-(3,5-difluorophenyl)acrylonitrile (**Z-3AN2PA-2F**) was synthesized by Knoevenagel  
30 condensation reaction. 9-anthracenecarboxaldehyde, phenyl acetonitrile, 4-  
31 (Trifluoromethyl)phenylacetonitrile and 3,5-Difluorophenylacetonitrile were  
32 purchased from commercial sources and used without further purification.

33  
34 Synthesis of Z-3-(anthracen-9-yl)-2-phenylacrylonitrile (**Z-3AN2PA**): Phenyl  
35 acetonitrile (0.01 mol, 1.17 g) was taken in 25 mL absolute ethanol. To the alcoholic  
36 solution, NaOMe (0.01 mol, 0.54 g) was added and stirred vigorously for 15 min. To  
37 this stirred mixture, a solution of 9-anthracenecarboxaldehyde (0.01 mol, 2.06 g) in 25  
38 mL of absolute ethanol was added slowly and stirred for 24h at room temperature. The  
39 shining yellow powder obtained were washed with excess absolute ethanol. <sup>1</sup>H NMR  
40 (400 MHz, DMSO-*d*<sub>6</sub>) δ 8.97 (s, 1H), 8.76 (s, 1H), 8.26 – 8.16 (m, 2H), 8.09 (d, *J* = 8.0  
41 Hz, 2H), 8.04 – 7.92 (m, 2H), 7.66 – 7.54 (m, 7H).

42  
43 Synthesis of Z-3-(anthracen-9-yl)-2-(4-(trifluoromethyl)phenyl)acrylonitrile (**Z-**  
44 **3AN2PA-CF<sub>3</sub>**): 4-(Trifluoromethyl)phenylacetonitrile (0.01 mol, 1.85 g) was taken in  
45 25 mL absolute ethanol. To the alcoholic solution, NaOMe (0.01 mol, 0.54 g) was  
46 added and stirred vigorously for 15 min. To this stirred mixture, a solution of 9-  
47 anthracenecarboxaldehyde (0.01 mol, 2.06 g) in 25 mL of absolute ethanol was added  
48 slowly and stirred for 4h at room temperature. The shining orange-yellow powder  
49 obtained were washed with excess absolute ethanol. <sup>1</sup>H NMR (400 MHz, DMSO-*d*<sub>6</sub>) δ  
50 9.18 (s, 1H), 8.79 (s, 1H), 8.22 (q, *J* = 4.0 Hz, 4H), 8.15 – 8.08 (m, 2H), 7.99 (d, *J* = 8.0  
51 Hz, 2H), 7.71 – 7.55 (m, 4H).

52  
53 Synthesis of Z-3-(anthracen-9-yl)-2-(3,5-difluorophenyl)acrylonitrile (**Z-**  
54 **3AN2PA-2F**): 3,5-Difluorophenylacetonitrile (0.01 mol, 1.53 g) was taken in 25 mL  
55 absolute ethanol. To the alcoholic solution, NaOMe (0.01 mol, 0.54 g) was added and  
56 stirred vigorously for 15 min. To this stirred mixture, a solution of 9-  
57 anthracenecarboxaldehyde (0.01 mol, 2.06 g) in 25 mL of absolute ethanol was added  
58 slowly and stirred for 24h at room temperature. The shining yellow powder obtained  
59 were washed with excess absolute ethanol. <sup>1</sup>H NMR (400 MHz, DMSO-*d*<sub>6</sub>) δ 9.15 (s,  
60 1H), 8.78 (s, 1H), 8.23 – 8.15 (m, 2H), 8.14 – 8.05 (m, 2H), 7.74 (dt, *J* = 8.0, 4.0 Hz,  
61 2H), 7.67 – 7.56 (m, 4H), 7.55 – 7.40 (m, 1H).

62  
63

### 64 **1.3 Crystal Growth**

65 0.01 g of **Z-3AN2PA**、**Z-3AN2PA-CF<sub>3</sub>** and **Z-3AN2PA-2F** was dissolved in 5 mL  
66 of DCM, 5 mL of EtOH, and 1 mL of water. And then the solutions were left to  
67 evaporate in the dark at room temperature for 2-3 days to afford the corresponding  
68 crystals.

### 69 **1.4 Single-crystal X-ray diffraction.**

70 The single-crystal X-ray diffraction data of **Z-3AN2PA**, **Z-3AN2PA-CF<sub>3</sub>**, **Z-**  
71 **3AN2PA-2F** were collected on an Xtalab Synergy at 150K, 303.15K and 100K with  
72 CuK $\alpha$  radiation ( $\lambda = 1.54184 \text{ \AA}$ ) and refined using the OLEX2- 1.5 suite of programs.  
73 The detailed crystallographic data for **Z-3AN2PA**, **Z-3AN2PA-CF<sub>3</sub>**, **Z-3AN2PA-2F**  
74 are summarized in Table S5. The crystallographic datas for **Z-3AN2PA**, **Z-3AN2PA-**  
75 **CF<sub>3</sub>**, **Z-3AN2PA-2F** were deposited with the Cambridge Structure Database Centre  
76 (CCDC) with number of 2469131, 2429964 and 2429965 for **Z-3AN2PA**, **Z-3AN2PA-**  
77 **CF<sub>3</sub>** and **Z-3AN2PA-2F**, respectively.

### 78 **1.5 Characterization.**

79 Powder X-ray diffraction (PXRD) data were collected at ambient temperature on a  
80 Rigaku standard Ultima IV diffractometer using a CuK $\alpha$  radiation, with a scan speed  
81 of  $5^\circ \text{ min}^{-1}$ , and  $2\theta$  ranging from  $5^\circ$  to  $50^\circ$ . For all samples, the experimental  
82 backgrounds were not corrected. The scanning electron microscopy (SEM) images  
83 were acquired on a JSM-7800F microscope with a primary electron energy of 10 kV.  
84 The UV-visible spectra were collected using a UV-2700 spectrometer with background  
85 correction. The FT-IR spectra were recorded using a Nicolet is50 IR spectrometer. A  
86 high-power UV LED spot lamp source (HEIGHT-LED, HTLD-4II) (maximum at  
87 365nm and 450 nm) was utilized to investigate the photomechanical motions of the  
88 single crystals. The optical power density was measured on a HEIGHT-LED Meter  
89 LED (illumination distance 1.5 cm: 4500 mW, 3400 mW). The  $^1\text{H}$  NMR spectra were  
90 recorded on a Bruker Avance II 400 MHz NMR spectrometer. The fluorescence spectra  
91 were recorded on a HITACHI F-4700 fluorescence spectrometer.

92

93

94

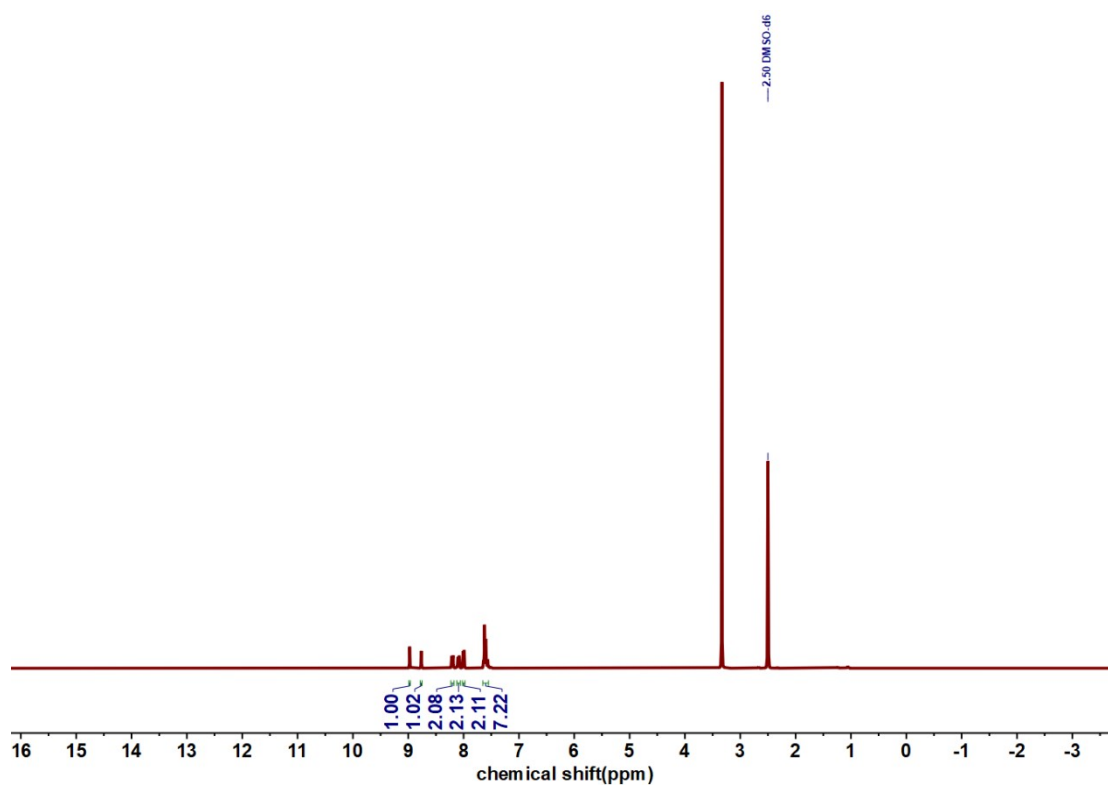

**Fig. S1.**  $^1\text{H}$  NMR spectrum (400 MHz,  $\text{DMSO-d}_6$ ) of **Z-3AN2PA**.

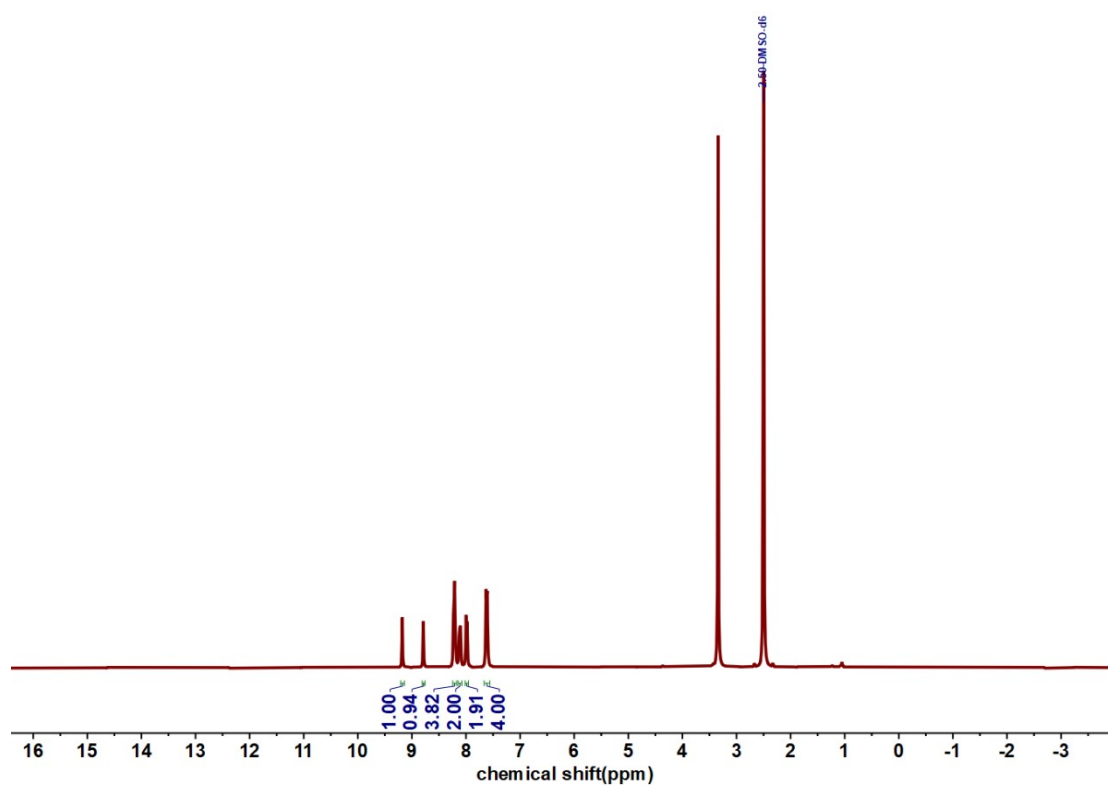

**Fig. S2.**  $^1\text{H}$  NMR spectrum (400 MHz,  $\text{DMSO-d}_6$ ) of **Z-3AN2PA-CF<sub>3</sub>**.

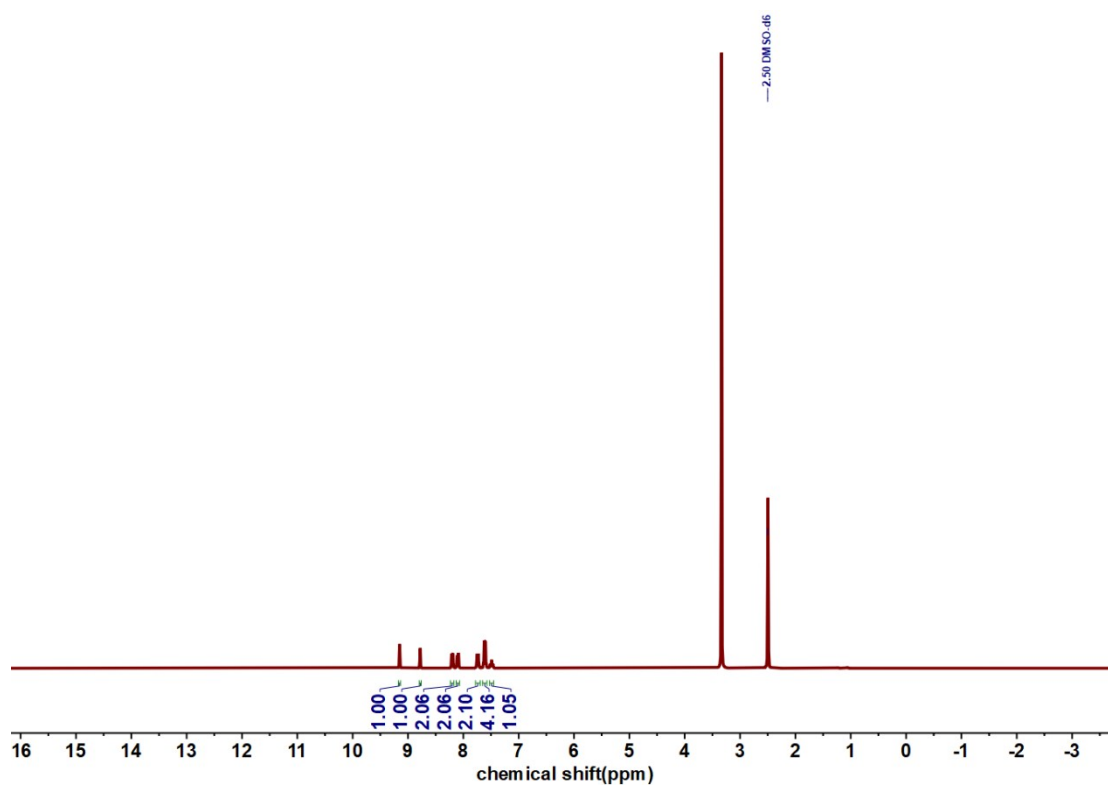

**Fig. S3.**  $^1\text{H}$  NMR spectrum (400 MHz,  $\text{DMSO-d}_6$ ) of **Z-3AN2PA-2F**.

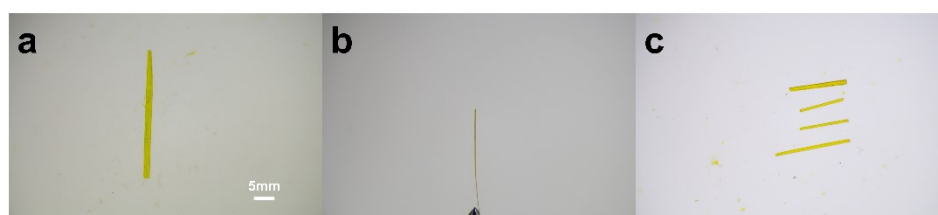

**Fig. S4.** The morphology pictures of **Z-3AN2PA** (a), **Z-3AN2PA- $\text{CF}_3$**  (b) and **Z-3AN2PA-2F** (c).

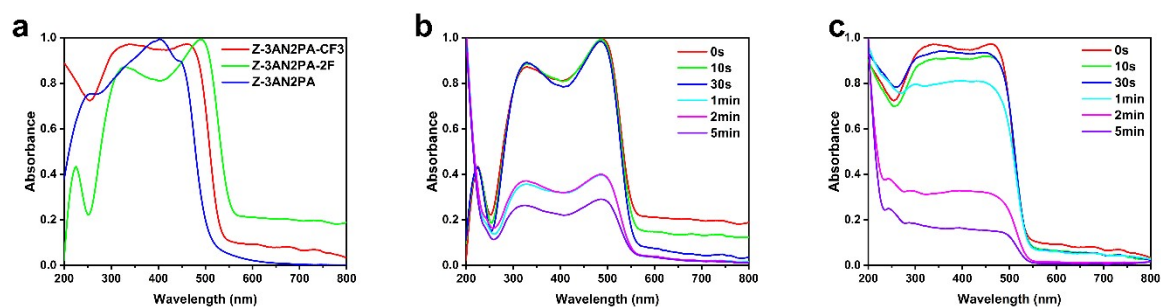

**Fig. S5.** UV-vis absorption spectra of **Z-3AN2PA**, **Z-3AN2PA- $\text{CF}_3$**  and **Z-3AN2PA-2F** (a). Time-dependent UV-Vis spectra for **Z-3AN2PA- $\text{CF}_3$**  (b) and **Z-3AN2PA-2F** (c) by 450 nm irradiation.

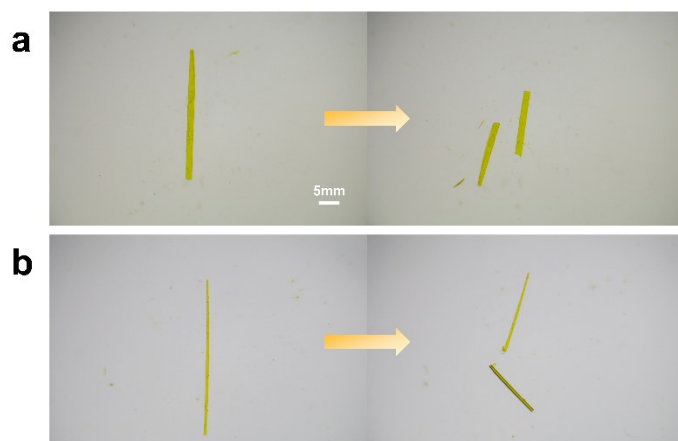

113

114 **Fig. S6.** Brittle fracture occurs in **Z-3AN2PA** (a) and **Z-3AN2PA-2F** (b) under external  
115 force.

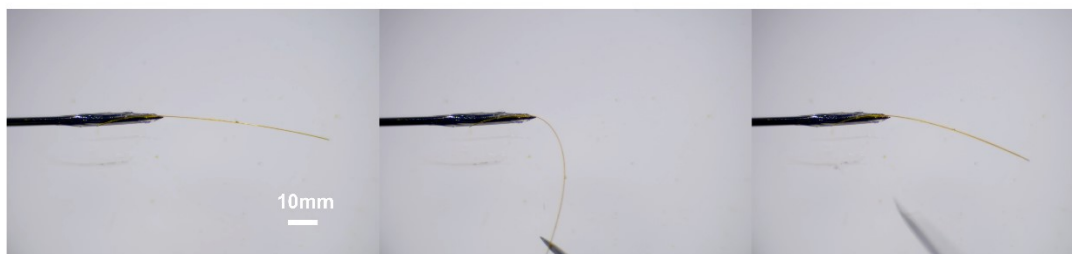

116

117 **Fig. S7.** The process of elastic bending of **Z-3AN2PA-CF<sub>3</sub>** crystals.

118

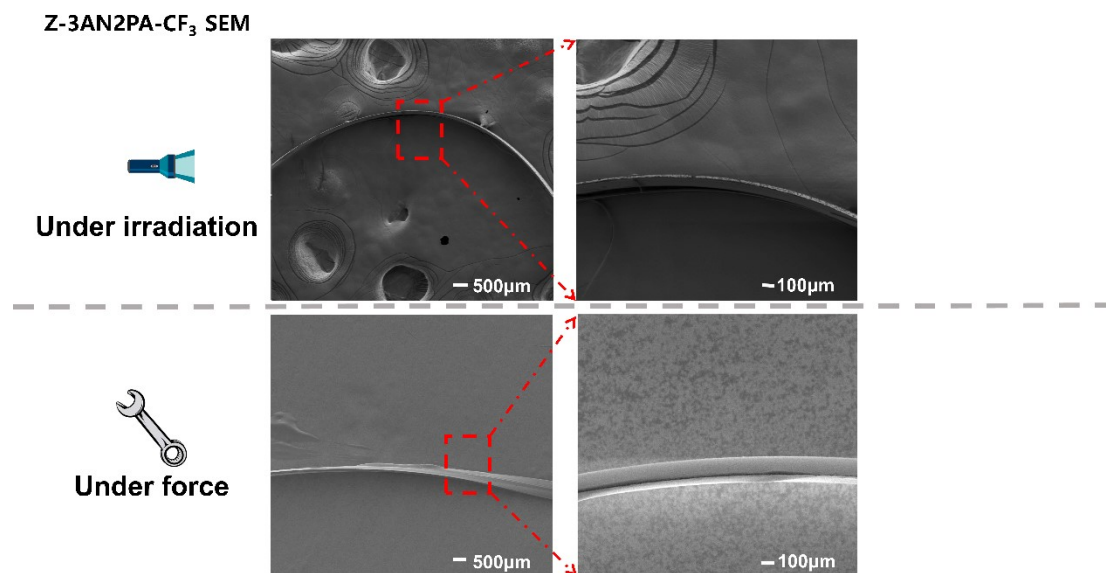

119

120 **Fig. S8.** Scanning electron microscopy images of **Z-3AN2PA-CF<sub>3</sub>** crystals after  
121 irradiation and mechanically induced bending.

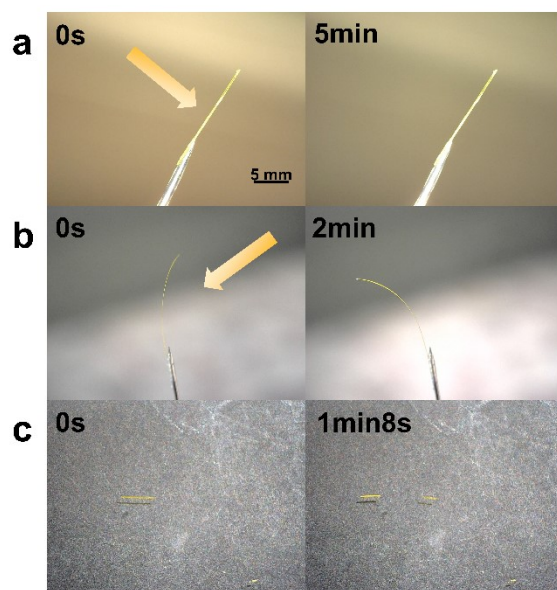

122

123 **Fig. S9.** The photomechanical behaviors of **Z-3AN2PA** (a), **Z-3AN2PA-CF<sub>3</sub>** (b), and  
124 **Z-3AN2PA-2F** (c) under sunlight irradiation.

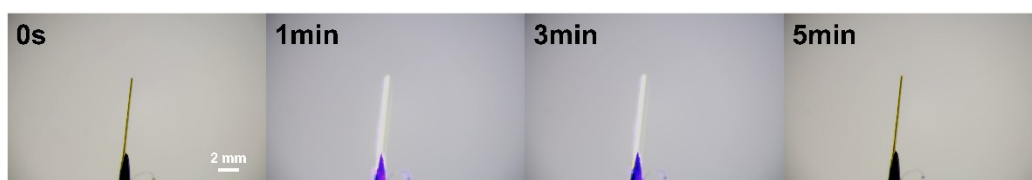

125

126 **Fig. S10.** The photomechanical behaviors of **Z-3AN2PA** under 365 nm irradiation.

127

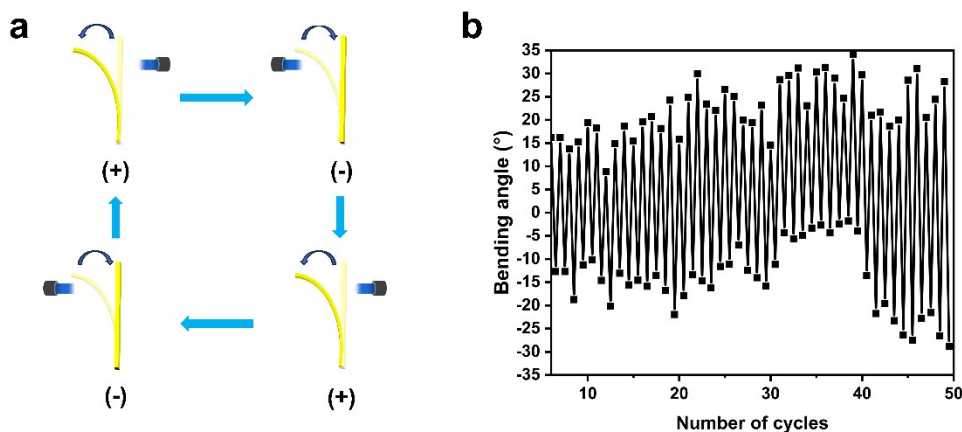

128

129 **Fig. S11.** Schematic illustration of the bending cycle test for **Z-3AN2PA-CF<sub>3</sub>** crystal.  
130 A positive bending (+) angle means that the light source is on the right of the crystal  
131 for 0.1 s and the crystal is bent to the left. A negative bending (-) angle means that the  
132 light source is irradiated for 0.1 s on the left of the crystal and the crystal is bent to the  
133 right (a). The bending angles of the **Z-3AN2PA-CF<sub>3</sub>** crystal during the 50th bending  
134 cycle. The irradiation time is 0.1 s for the first 40 irradiation durations, and 0.2 s for the  
135 last 10 irradiation durations (b).

136

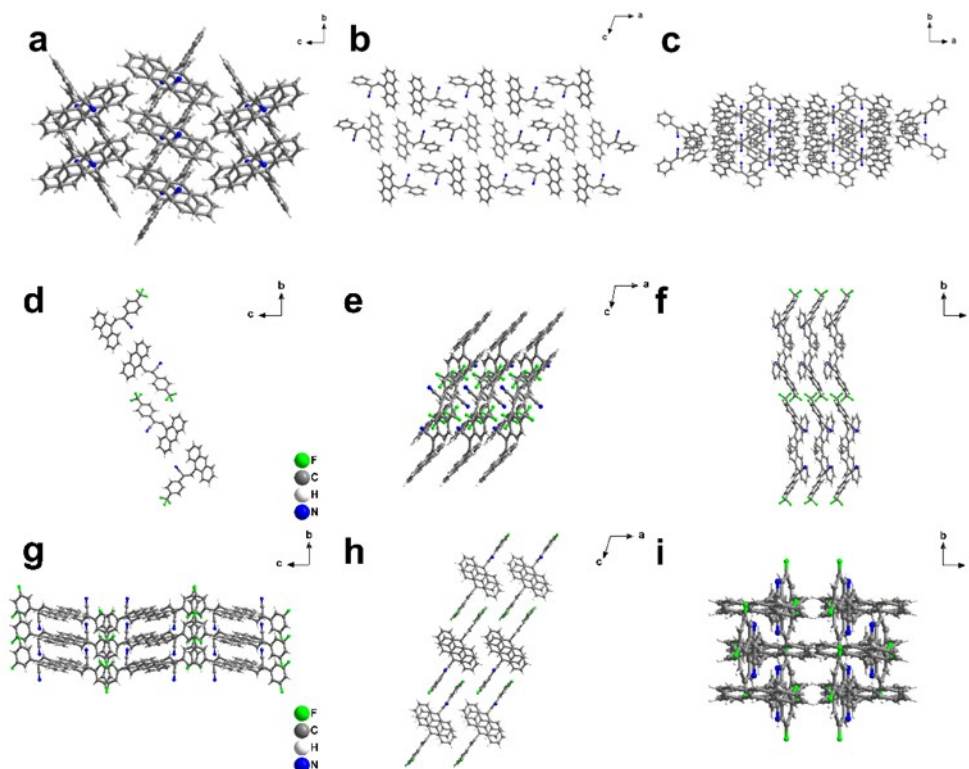

137

138 **Fig. S12.** The packing structures of **Z-3AN2PA** (a-c), **Z-3AN2PA-CF<sub>3</sub>** (d-f) and **Z-**  
 139 **3AN2PA-2F** (g-i) viewed along the *a*-axis, *b*-axis, and *c*-axis.

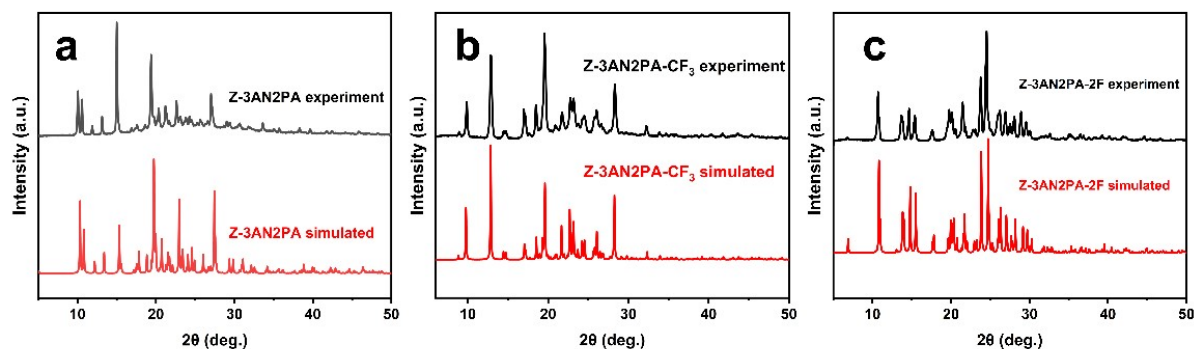

140

141 **Fig. S13.** PXRD patterns of **Z-3AN2PA** (a), **Z-3AN2PA-CF<sub>3</sub>** (b), and **Z-3AN2PA-2F**  
 142 (c).

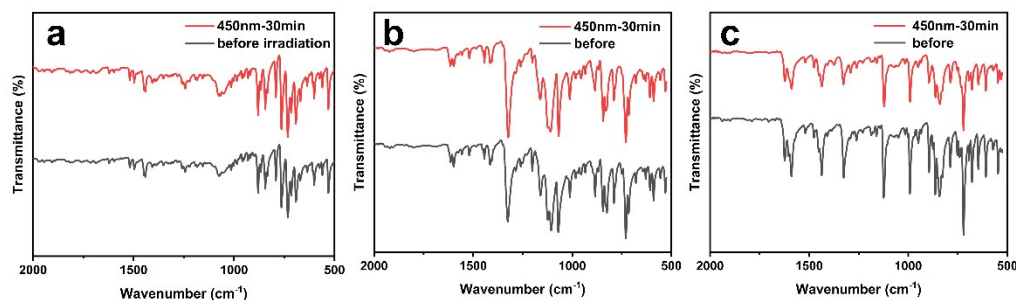

143

144 **Fig. S14.** FT-IR spectra of **Z-3AN2PA** (a), **Z-3AN2PA-CF<sub>3</sub>** (b), and **Z-3AN2PA-2F**  
 145 (c) before and after irradiation.



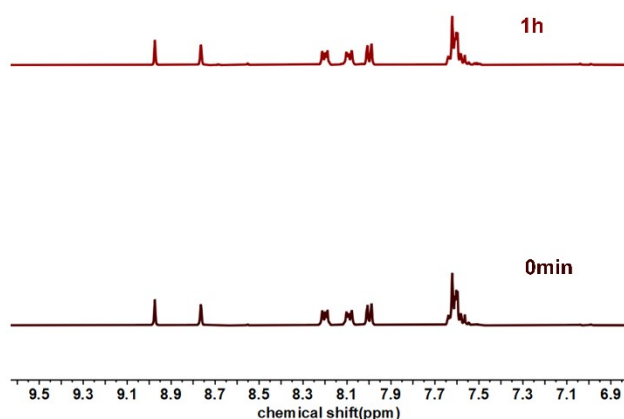

**Fig. S15.** Time-dependent  $^1\text{H}$  NMR (400 MHz, DMSO- $d_6$ ) spectra of **Z-3AN2PA**.

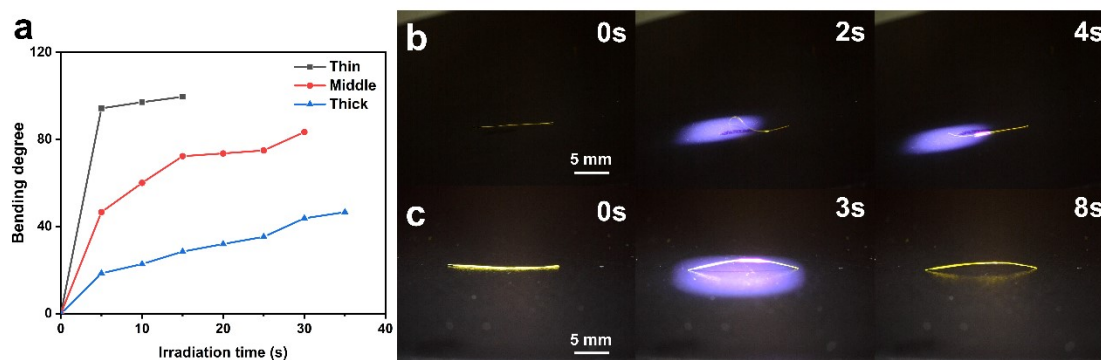

**Fig. S16.** Bending degree of **Z-3AN2PA-CF<sub>3</sub>** crystals with different thicknesses(a). Photomechanical behavior of thinner **Z-3AN2PA-CF<sub>3</sub>** crystal on the Plane (b). Photomechanical response behavior of Thicker **Z-3AN2PA-CF<sub>3</sub>** Crystal on the Plane (c). (thinner size: 0.018 mm; middle size: 0.064 mm; thick size: 0.108 mm)

**Table S1.** The temperature variation measured by Infrared thermal imager under 450 nm light irradiation.

| Irradiation time | 0s     | 10s    | 60s    | 180s   | 300s   |
|------------------|--------|--------|--------|--------|--------|
| Temperature      | 22.8°C | 23.3°C | 26.2°C | 30.4°C | 32.9°C |

168 **Table S2.** Crystallographic information for the crystals of **Z-3AN2PA**, **Z-3AN2PA-CF<sub>3</sub>** and **Z-**  
169 **3AN2PA-2F**.

|                                                                             | <b>Z-3AN2PA</b>                                                   | <b>Z-3AN2PA-CF<sub>3</sub></b>                                    | <b>Z-3AN2PA-2F</b>                                                |
|-----------------------------------------------------------------------------|-------------------------------------------------------------------|-------------------------------------------------------------------|-------------------------------------------------------------------|
| Formula                                                                     | C <sub>23</sub> H <sub>15</sub> N                                 | C <sub>24</sub> H <sub>14</sub> F <sub>3</sub> N                  | C <sub>23</sub> H <sub>13</sub> F <sub>2</sub> N                  |
| CCDC number                                                                 | 2469131                                                           | 2429964                                                           | 2429965                                                           |
| Crystal system                                                              | monoclinic                                                        | monoclinic                                                        | monoclinic                                                        |
| Space group                                                                 | <i>P2<sub>1</sub>/c</i>                                           | <i>P2<sub>1</sub>/c</i>                                           | <i>C2/c</i>                                                       |
| <i>a</i> /Å                                                                 | 18.3518(3)                                                        | 4.67530(10)                                                       | 17.2254(6)                                                        |
| <i>b</i> /Å                                                                 | 5.28900(10)                                                       | 36.9040(11)                                                       | 7.4849(2)                                                         |
| <i>c</i> /Å                                                                 | 17.3164(3)                                                        | 10.6315(3)                                                        | 26.9940(7)                                                        |
| <i>α</i> /°                                                                 | 90                                                                | 90                                                                | 90                                                                |
| <i>β</i> /°                                                                 | 109.188(2)                                                        | 100.522(3)                                                        | 107.221(3)                                                        |
| <i>γ</i> /°                                                                 | 90                                                                | 90                                                                | 90                                                                |
| Volume/Å <sup>3</sup>                                                       | 1587.40(5)                                                        | 1803.49(9)                                                        | 3324.32(18)                                                       |
| <i>Z</i>                                                                    | 4                                                                 | 4                                                                 | 8                                                                 |
| $\rho_{\text{calc}}/\text{g cm}^{-3}$                                       | 1.278                                                             | 1.375                                                             | 1.364                                                             |
| $\mu/\text{mm}^{-1}$                                                        | 0.567                                                             | 0.850                                                             | 0.781                                                             |
| <i>F</i> (000)                                                              | 640.0                                                             | 768.0                                                             | 1408.0                                                            |
| <i>R</i> <sub>int</sub>                                                     | 0.214                                                             | 0.291                                                             | 0.293                                                             |
| GoF                                                                         | 1.066                                                             | 1.082                                                             | 1.069                                                             |
| <i>R</i> <sub>1</sub> , <i>wR</i> <sub>2</sub> [ <i>I</i> > 2σ( <i>I</i> )] | <i>R</i> <sub>1</sub> = 0.0355<br><i>wR</i> <sub>2</sub> = 0.0967 | <i>R</i> <sub>1</sub> = 0.0651<br><i>wR</i> <sub>2</sub> = 0.1772 | <i>R</i> <sub>1</sub> = 0.0623<br><i>wR</i> <sub>2</sub> = 0.1780 |
| <i>R</i> <sub>1</sub> , <i>wR</i> <sub>2</sub> [all data]                   | <i>R</i> <sub>1</sub> = 0.0389<br><i>wR</i> <sub>2</sub> = 0.0997 | <i>R</i> <sub>1</sub> = 0.0857<br><i>wR</i> <sub>2</sub> = 0.1895 | <i>R</i> <sub>1</sub> = 0.0856<br><i>wR</i> <sub>2</sub> = 0.1946 |
